# Supplementary material
Source: PubMed Central journal article supplement (PMC3361015)
Supplement: supp_jn.111.140012_OSM_T1-T3.pdf [file supp_jn.111.140012_OSM_T1-T3.pdf]

## Online Supporting Material

**Supplemental Table 1.** The monthly mean and population distribution of plasma 25-OHD in adults in Scotland throughout the year.

| Month      | <i>n</i> | 25-OHD,<br><i>nmol/L</i> | 25-OHD, <i>nmol/L</i> |      |             |      |             |      |             |      |               |      |          |      |
|------------|----------|--------------------------|-----------------------|------|-------------|------|-------------|------|-------------|------|---------------|------|----------|------|
|            |          |                          | > 80                  |      | ≥50 and <80 |      | ≥40 and <50 |      | ≥25 and <40 |      | ≥12.5 and <25 |      | < 12.5   |      |
|            |          |                          | <i>n</i>              | %    | <i>n</i>    | %    | <i>n</i>    | %    | <i>n</i>    | %    | <i>n</i>      | %    | <i>n</i> | %    |
| <b>Jan</b> | 139      | 26.5 ± 16.25             | 2                     | 1.4  | 10          | 7.2  | 12          | 8.6  | 46          | 33.1 | 45            | 32.4 | 24       | 17.3 |
| <b>Feb</b> | 164      | 30 ± 18.5                | 4                     | 2.4  | 17          | 10.4 | 14          | 8.5  | 52          | 31.7 | 52            | 31.7 | 25       | 15.2 |
| <b>Mar</b> | 182      | 32.5 ± 24.25             | 2                     | 1.1  | 11          | 6.0  | 20          | 11.0 | 52          | 28.6 | 57            | 31.3 | 40       | 22.0 |
| <b>Apr</b> | 103      | 39.75 ± 19.5             | 3                     | 2.9  | 11          | 10.7 | 13          | 12.6 | 27          | 26.2 | 28            | 27.2 | 21       | 20.4 |
| <b>May</b> | 150      | 43 ± 17.25               | 2                     | 1.3  | 22          | 14.7 | 23          | 15.3 | 47          | 31.3 | 43            | 28.7 | 13       | 8.7  |
| <b>Jun</b> | 271      | 52 ± 21                  | 9                     | 3.3  | 61          | 22.5 | 51          | 18.8 | 84          | 31.0 | 49            | 18.1 | 17       | 6.3  |
| <b>Jul</b> | 201      | 43.25 ± 21               | 11                    | 5.5  | 56          | 27.9 | 35          | 17.4 | 65          | 32.3 | 25            | 12.4 | 9        | 4.5  |
| <b>Aug</b> | 216      | 32 ± 26                  | 32                    | 14.8 | 77          | 35.6 | 35          | 16.2 | 41          | 19.0 | 21            | 9.7  | 10       | 4.6  |
| <b>Sep</b> | 187      | 36.25 ± 22.75            | 11                    | 5.9  | 49          | 26.2 | 35          | 18.7 | 56          | 29.9 | 28            | 15.0 | 8        | 4.3  |
| <b>Oct</b> | 232      | 28.25 ± 20.25            | 6                     | 2.6  | 36          | 15.5 | 31          | 13.4 | 53          | 22.8 | 69            | 29.7 | 37       | 15.9 |
| <b>Nov</b> | 225      | 36 ± 18.5                | 4                     | 1.8  | 52          | 23.1 | 26          | 11.6 | 80          | 35.6 | 42            | 18.7 | 21       | 9.3  |
| <b>Dec</b> | 165      | 28.25 ± 22               | 6                     | 3.6  | 9           | 5.5  | 19          | 11.5 | 43          | 26.1 | 49            | 29.7 | 39       | 23.6 |
| <b>ALL</b> | 2235     | 36 ± 22.25               | 92                    | 4.1  | 411         | 18.4 | 314         | 14.0 | 646         | 28.9 | 508           | 22.7 | 264      | 11.8 |

Online Supporting Material

**Supplemental Table 2. Plasma 25-OHD concentrations in adults in Scotland by level of total vitamin D intake (from food and supplements) and quartile of outdoor activity <sup>1</sup>.**

| Total vitamin D intake quartile | Total activity quartiles, <i>h/wk</i> |                |                 |       |
|---------------------------------|---------------------------------------|----------------|-----------------|-------|
|                                 | <7                                    | ≥7.0 and <12.5 | ≥12.5 and <21.1 | ≥21.1 |
| <b>&lt;3.3 µg/d</b>             |                                       |                |                 |       |
| <i>n</i>                        | 130                                   | 129            | 108             | 128   |
| 25-OHD median, <i>nmol/L</i>    | 21.7                                  | 27.5           | 26.6            | 29.6  |
| 25-OHD <25 nmol/L, %            | 58                                    | 45             | 44              | 35    |
| <b>≥3.3 and &lt;4.9 µg/d</b>    |                                       |                |                 |       |
| <i>n</i>                        | 129                                   | 129            | 128             | 108   |
| 25-OHD median, <i>nmol/L</i>    | 26.6                                  | 27.8           | 25.9            | 31.3  |
| 25-OHD <25 nmol/L, %            | 47                                    | 41             | 45              | 33    |
| <b>≥4.9 and &lt;8.0 µg/d</b>    |                                       |                |                 |       |
| <i>n</i>                        | 129                                   | 131            | 136             | 99    |
| 25-OHD median, <i>nmol/L</i>    | 29.3                                  | 30.9           | 35.8            | 31.9  |
| 25-OHD <25 nmol/L, %            | 38                                    | 34             | 24              | 32    |
| <b>≥8.0 µg/d</b>                |                                       |                |                 |       |
| <i>n</i>                        | 105                                   | 102            | 127             | 161   |
| 25-OHD median, <i>nmol/L</i>    | 33.0                                  | 35.1           | 33.4            | 37.8  |
| 25-OHD <25 nmol/L, %            | 27                                    | 26             | 27              | 26    |

<sup>1</sup> In total 274 participants were excluded from this analysis due to missing data regarding outdoor activity and vitamin D intake from supplements and food

Online Supporting Material

**Supplemental Table 3. Plasma 25-OHD concentrations in adults in Scotland by level of vitamin D intake from food only and quartile of outdoor activity <sup>1</sup>.**

| Food vitamin D intake quartiles | Total activity quartiles, <i>h/wk</i> |                |                 |       |
|---------------------------------|---------------------------------------|----------------|-----------------|-------|
|                                 | <7                                    | ≥7.0 and <12.5 | ≥12.5 and <21.1 | ≥21.1 |
| <b>&lt;2.9 µg/d</b>             |                                       |                |                 |       |
| <i>n</i>                        | 136                                   | 125            | 113             | 121   |
| 25-OHD median, <i>nmol/L</i>    | 26.3                                  | 28.9           | 29.9            | 30.8  |
| 25-OHD <25 nmol/L, %            | 48                                    | 40             | 36              | 36    |
| <b>≥2.9 and &lt;4.1 µg/d</b>    |                                       |                |                 |       |
| <i>n</i>                        | 122                                   | 127            | 115             | 130   |
| 25-OHD median, <i>nmol/L</i>    | 25.8                                  | 31.3           | 30.1            | 30.6  |
| 25-OHD <25 nmol/L, %            | 48                                    | 35             | 36              | 32    |
| <b>≥4.1 and &lt;5.8 µg/d</b>    |                                       |                |                 |       |
| <i>n</i>                        | 116                                   | 121            | 148             | 110   |
| 25-OHD median, <i>nmol/L</i>    | 28.1                                  | 27.6           | 29.7            | 34.6  |
| 25-OHD <25 nmol/L, %            | 42                                    | 40             | 34              | 26    |
| <b>&gt;5.8 µg/d</b>             |                                       |                |                 |       |
| <i>n</i>                        | 119                                   | 118            | 123             | 135   |
| 25-OHD median, <i>nmol/L</i>    | 30.8                                  | 31.7           | 32.4            | 34.8  |
| 25-OHD <25 nmol/L, %            | 34                                    | 32             | 31              | 31    |

<sup>1</sup> In total 274 participants were excluded from this analysis due to missing data regarding outdoor activity and vitamin D intake from supplements and food
